# Supplementary material
Source: PubMed Central journal article supplement (PMC2785079)
Supplement: NIHMS151058-supplement-01.pdf [file NIHMS151058-supplement-01.pdf]

**Supplementary Tables and Figures**

**Supplementary Table 1.** Analysis of miRNA and miRNA\* species in total RNA, AGO1 complex, and AGO2 complex in S2-NP cells. The first worksheet includes the full analysis of all miRNA genes. The second worksheet includes the subset of 38 genes exhibiting >100 miRNA reads and >10 miRNA\* reads in total RNA, which were used in Figure 5A. These tables tabulate the number of miRNA and miRNA\* reads in total S2NP RNA (GSM371638), S2NP AGO1-IP (GSM280088) and S2NP AGO2-IP (GSM280087) sequence datasets. Enrichments in the IP libraries were calculated with respect to their miRNA/miRNA\* ratio present in total RNA.

**Supplementary Table 2.** Analysis of miRNA reads and miRNA\* reads from S2-NP total RNA, AGO1-IP and AGO2-IP, from ovary total RNA and AGO2-IP, and from S2-Z total RNA and beta-eliminated RNA. These data were used in Figure 4C.

**Supplementary Table 3.** Analysis of the pairing status of miRNA and miRNA\* species used in Figure 5.

**Supplementary Table 4.** Target searches of AGO2-loaded miRNA\* species. We searched for candidate targeting of bantam\*, miR-276a\*, miR-184\* and miR-308\* on annotated mRNAs (including 5'UTRs, CDS and 3' UTRs), permitting up to two mismatches and a variable number of G:U pairs. The top worksheet summarizes the number of hits to the sense (S) and the antisense (AS) strand of mRNAs across different thresholds of G:U pairing; the data are separated by miRNA\* and strand in the next eight worksheets. We did not observe substantial differences between the number of S and AS hits for each miRNA\*. The large number of miR-308\* hits seems to be attributable to

its high uridine content, which results in a large number of sites with a high degree of G:U pairing.

**Supplementary Table 5.** Sequences of DNA oligonucleotides used to clone luciferase sensors, 2'Ome oligonucleotides used for miRNA inhibition, and RNA oligos used for in vitro sorting assay.



**Supplementary Figure 2.** Independent sorting of the strands of *mir-184* duplex. We used the in vitro assay described in Figure 4. miR-184 was exclusively selected by AGO1, whereas miR-184\* was preferentially selected by AGO2.

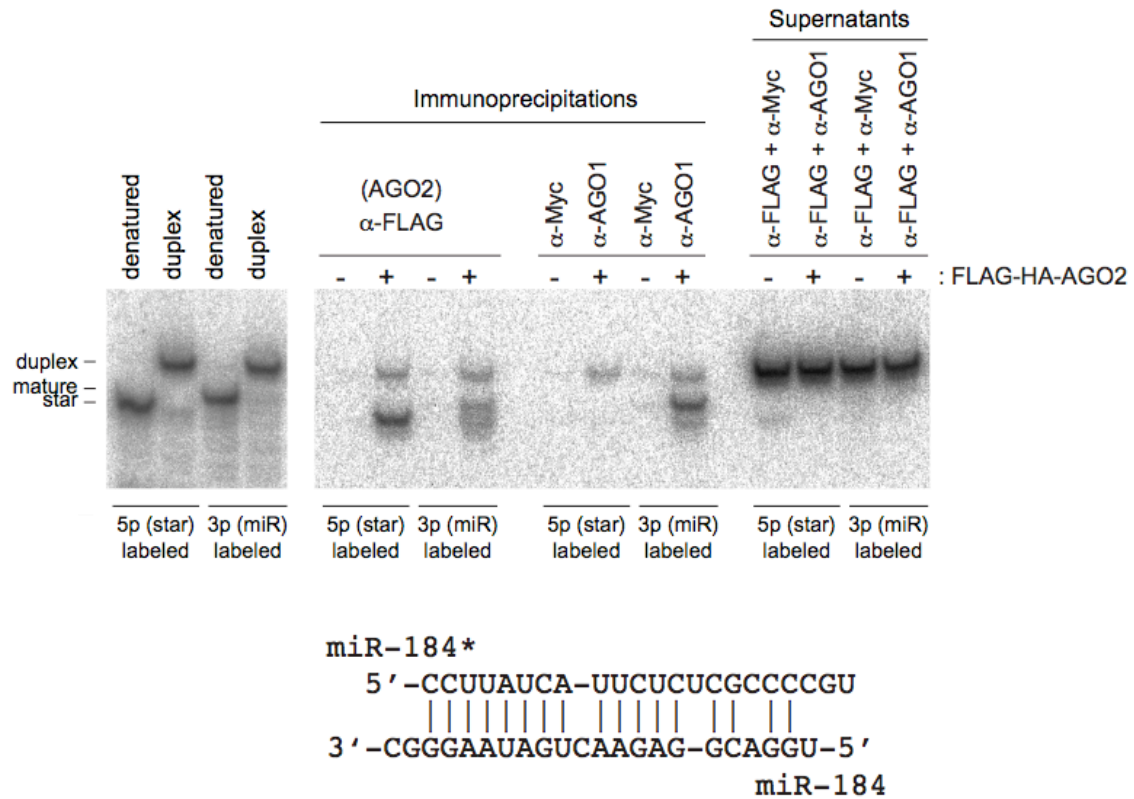

**Supplementary Figure 3.** Maturation of miR-276a\*-programmed AGO2 complex does not require passenger strand cleavage. We introduced non-cleavable phosphorothioate (PS) linkages at the predicted site of passenger strand cleavage, and compared their in vitro sorting to wildtype *mir-276a* duplex. Maturation of single-stranded AGO2 complex was not affected by the PS substitutions.

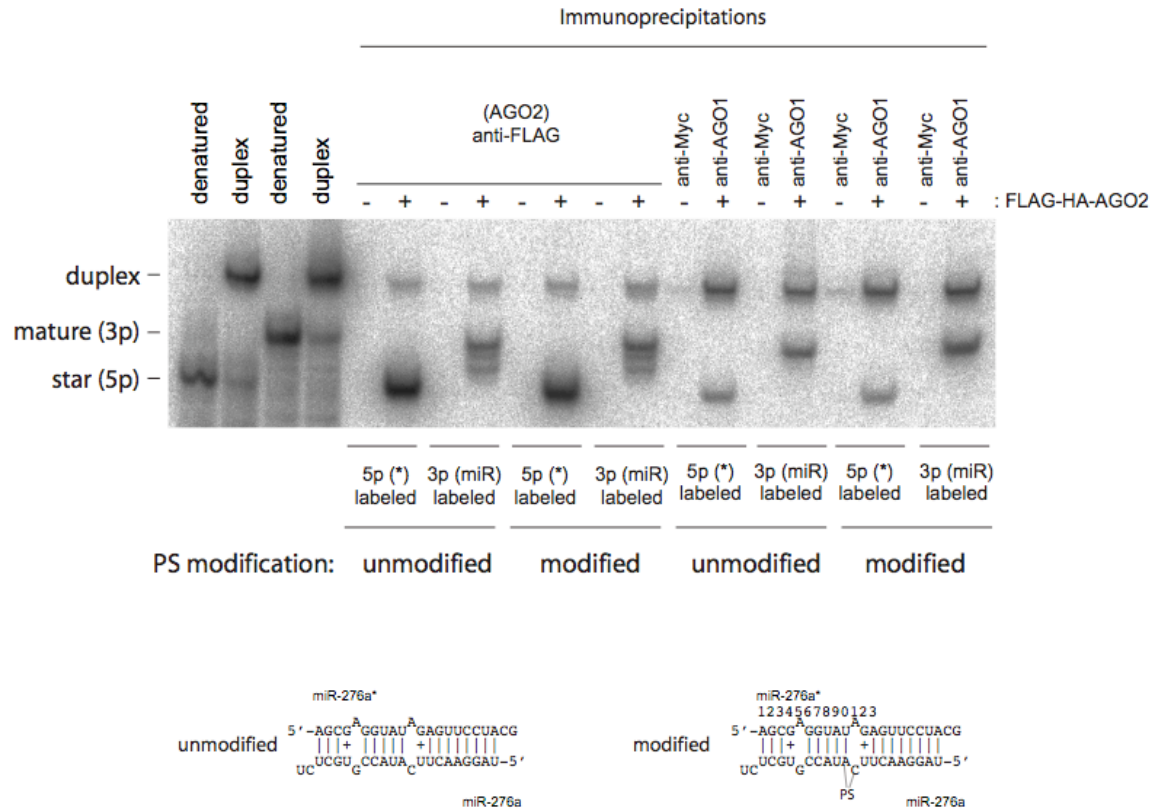



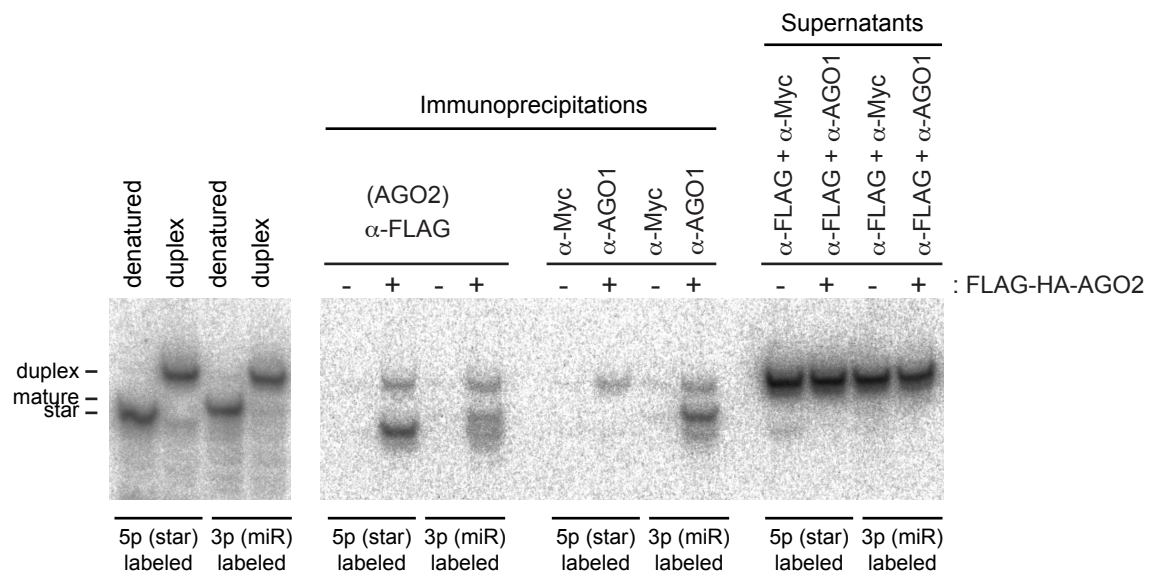

miR-184\*

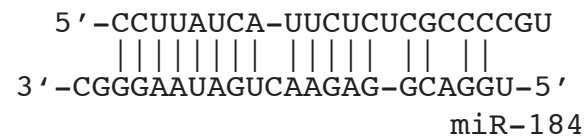

Supplementary Figure 2  
Okamura et al

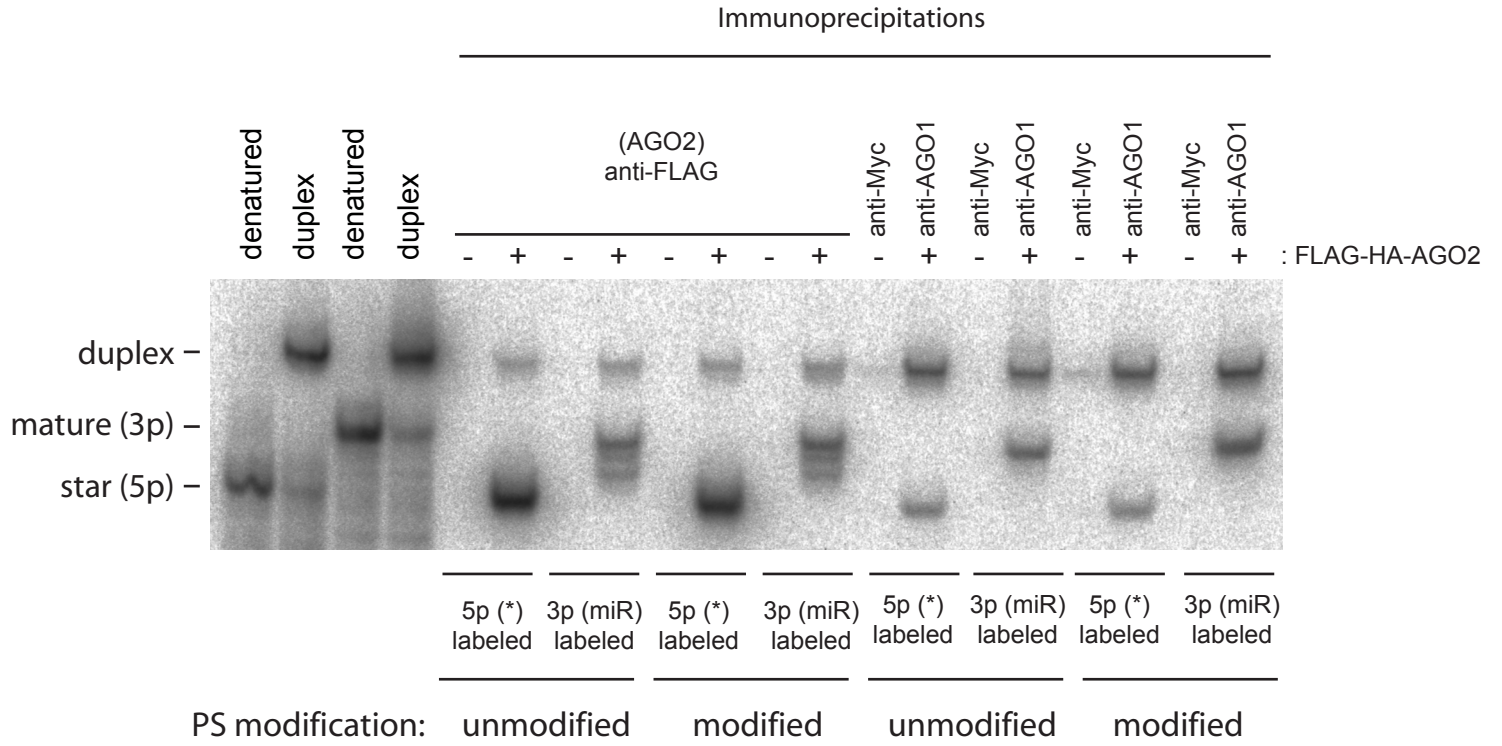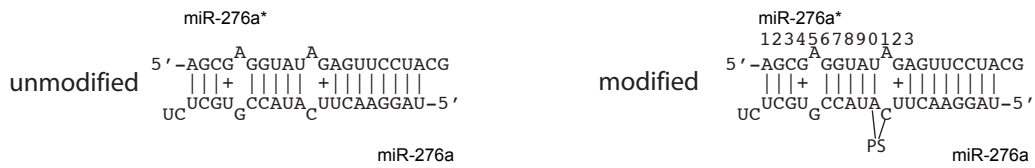

Supplementary Figure 3  
Okamura et al
